# Supplementary material for: Twin introductions by independent invader mussel lineages are both associated with recent admixture with a native congener in Australia
Source: PubMed Central journal article supplement (PMC7045716; doi:10.1111/eva.12857), 2019-09-18

## 1 **Supplementary Material**

2

### 3 **Methods**

4

#### 5 ***RNAseq data processing and reference transcriptome assembly***

6

7 We used Trimmomatic (v0.36) (Bolger et al. 2014) to remove adapter sequences from paired reads.  
8 Quality trimming was performed using a 4 bp sliding window, a phred-scale average quality score of 20  
9 and a minimum size filter of 50 bp. We reduced redundancy among high-coverage reads (including  
10 rRNA contaminants) and discarded associated sequence errors by digitally normalising each dataset  
11 using Trinity's `insilico_read_normalization.pl` script with a default kmer size of 25 and maximum read  
12 coverage of 50 (Grabherr et al. 2011). Overlapping paired reads were merged using FLASH v1.2.11  
13 (Magoč and Salzberg 2011) with a minimum overlap length of 10 bp. Three *M. galloprovincialis*  
14 individuals (those with the highest FLASH merging scores: the highest absolute number of reads  
15 merged into larger fragments) from three native-range populations (refer to Table 1) were used to make  
16 a reference transcriptome assembly intending to capture representative proportions of genetic variation  
17 in the *M. galloprovincialis* native range. These samples were used to create three population-specific  
18 *de novo* assemblies using Trinity v2.0.6 (Grabherr et al. 2011) with default parameters. The longest  
19 isoforms were extracted for each gene group for each assembly. The three reduced Trinity assemblies  
20 were meta-assembled using CAP3 (Huang and Madan 1999) with default parameters into a single high-  
21 quality *M. galloprovincialis* reference assembly.

22

23 We queried the resulting assembly against the Uniprot-Swissprot protein database using blastx with an  
24 e-value threshold of  $10^{-3}$  for significant matches. Contigs with significant blast matches to likely  
25 environmental contaminants, including bacteria, fungi, viruses, protists (Alveolata), green (Viridiplantae)  
26 and red algae (Haptophyceae), and other eukaryotic contaminants (i.e. Euglenozoa) were removed  
27 using Biopython v1.68 and R (184,842 contigs; R Development Core Team 2017). Prior to genomic  
28 analyses, transcripts showing high sequence similarity in the reference assembly (i.e. likely derived from  
29 the same gene) were clustered using Cd-Hit-Est (Li and Godzik 2006; Fu et al. 2012) with a minimum  
30 sequence identity threshold of 95% of the shortest sequence. Finally, we removed transcripts with  
31 significant blastn matches (e-value  $10^{-3}$ ) to the *M. galloprovincialis* male (Genbank reference:  
32 FJ890850.1) and female (Genbank reference: FJ890849.1) mitochondrial genomes. The resulting  
33 159,985 nuclear sequences were used as a reference assembly for variant discovery and as input for  
34 all downstream analyses.

35

## 36 **Approximate Bayesian Computations (ABC) of demographic history**

37

### 38 *Empirical genetic data*

39

40 We reduced the reference assembly to only contigs containing predicted open reading frames (ORFs),  
41 using Transdecoder (Haas et al. 2013); we identified protein-coding sequences greater than 100 amino  
42 acids and with significant matches to the Pfam protein database. This resulted in 52,364 transcripts with  
43 ORFs, including 16,151 complete protein-coding nuclear loci (in which both start and stop codons were  
44 detected). We mapped individual reads datasets (as described above) against this reduced complete  
45 protein-coding assembly and used the resulting BAM files as input for downstream ABC analyses. We  
46 conducted two pairwise population comparisons to calculate summary statistics: We compared the  
47 genomic backgrounds of *M. planulatus* sampled in Tasmania (putative endemic) with two divergent *M.*  
48 *galloprovincialis* lineages from its native range in the Mediterranean and Atlantic. For each dataset, the  
49 *reads2snps* program was used to predict individual genotypes based on a probabilistic maximum-  
50 likelihood framework. Genotypes below a minimum read depth of 10 and genotype posterior probability  
51 of 95% were removed as well as variants resulting from the misalignment of reads to paralogous contigs.  
52 Subsequent analyses were conducted on the output of *reads2snps* using custom scripts in R (available  
53 at <https://github.com/dinmatias>). The R scripts implement an existing pipeline available from the  
54 PopPhyl project (<https://github.com/popgenomics/popPhylABC>; Roux et al. 2016). For each pairwise  
55 population comparison, we used PolydNdS to retain only synonymous variants and transcripts above a  
56 minimum length of 30 synonymous sites. Following these filtering thresholds, we removed monomorphic  
57 loci and loci with missing haplotypes for any individuals. The resulting empirical datasets consisted of  
58 1,362 loci for Mediterranean-Tasmania, and 1,539 loci for Atlantic-Tasmania population pairs.

59

### 60 *Coalescent simulations of genetic data*

61

62 We used msnsam, a modified version of the ms coalescent simulator, to generate one million multilocus  
63 simulations under each demographic model, for each population pair (Ross-Ibarra et al. 2008).  
64 Simulations assumed a neutral mutation rate  $\mu=2.763 \times 10^{-8}$  per bp per generation, which was scaled by  
65 the number of synonymous sites of each locus to obtain per-locus mutation rates. To account for  
66 recombination, we followed the recombination rate implemented by Roux et al. (2016), which is equal  
67 to 0.5 of the mutation rate. Initial models assumed equal (i.e. homogenous) effective population size  
68 ( $N_e$ ) among loci and homogeneous migration rate,  $M=4 N_{ref} m$  every generation, where  $N_{ref}$  is the

69 reference effective population size and  $m$  is the proportion of each population consisting of new migrants  
70 each generation.

71

72 Each simulation was parametrised by model-specific demographic parameters randomly drawn from a  
73 uniform prior distribution (Table S1) generated by a modified version of the *priorgen* software (Ross-  
74 Ibarra et al. 2008). Effective population size parameters ( $N_i$ ,  $N_j$ , and  $N_{ancestral}$ ) were randomly drawn from  
75 a distribution of 1000-500,000 individuals. To inform the priors for time-related parameters, we  
76 capitalised on previous divergence estimates for *Mytilus* species translated to generations using a  
77 generation time of 2 years (e.g., Roux et al. 2014). Specifically, divergence time ( $T_{div}$ ) was sampled from  
78 the interval 100,000-1,750,000 generations to capture the earliest estimated time of mitochondrial  
79 divergence between southern hemisphere taxa and *M. galloprovincialis* between 0.54-1.31 million years  
80 ago (Gérard et al. 2008). The upper bound for  $T_{div}$  was informed by the estimated splitting time between  
81 *M. trossulus* and the ancestor of *M. edulis* and *M. galloprovincialis* (~3.5 million years) that preceded  
82 potential periods of transequatorial migration associated with the late Pliocene about 3.1 million years  
83 ago (Lindberg 1991; Hilbish et al. 2000). The prior distribution for bidirectional ancient migration ( $ma$ )  
84 between northern and southern hemispheres was sampled between 0-0.0001 (equivalent to 0-200  
85 migrants per generation when  $N_{ref}=500,000$ ). We sampled the number of generations since ancient  
86 migration ceased ( $T_{nc}$ ) bounded by the interval  $T_{div}-10,000$  generations (corresponding to the last glacial  
87 maximum). For the invasive migration parameter ( $m$ ) we explored unidirectional gene flow values  
88 sampled on a broader interval  $m=0-0.5$  into Tasmania. We sampled the onset of human mediated  
89 secondary contact ( $T_{sc}$ ) on the interval 5-300 generations. A standard set of 39 summary statistics (e.g.,  
90 Roux et al. 2014; Fraïsse et al. 2014) of divergence and polymorphism were calculated for each  
91 simulation and for the empirical genetic data using *Mscalc* (Ross-Ibarra et al. 2008).

92

### 93 *Demographic model selection*

94

95 To evaluate the posterior support for alternative demographic models, we obtained posterior samples  
96 from all simulated data by applying thresholds of 0.001 and 0.01. An acceptance threshold of 0.001 is  
97 equivalent to 6000 simulations that generated summary statistics falling closest to the observed  
98 empirical values (Blum and François 2009). To estimate the posterior probability of each model, we  
99 performed a categorical regression on the model indices and summary statistics of the posterior  
100 samples using the feed-forward neural network method (Beaumont 2010). Computations were  
101 performed with 50 trained neural networks and a maximum of 2000 iterations while weighing each  
102 posterior sample by an Epanechnikov kernel with a maximum value when the simulated values are

103 equal to the observed summary statistics. In comparisons where not all six demographic models had  
104 accepted values within the applied threshold, the simple rejection method (i.e. linear regression) was  
105 applied (Beaumont et al. 2010). All these procedures were conducted using the packages `abc` (Csilléry  
106 et al. 2012) and `nnet` (Ripley et al. 2016) in R.

107

108 To validate the ability to discriminate between alternative models, we simulated an additional 1000  
109 pseudo-observed datasets (PODS) from the prior distribution for each demographic model to perform  
110 model checking. Using each POD as the new empirical dataset, we estimated posterior support for each  
111 model given the original simulated summary statistics utilising the model selection procedure (as  
112 described above). We then examined the rate by which our approach correctly supported the true model  
113 of the PODs (i.e. precision) and the rate of by which incorrect models are supported (i.e. misclassification  
114 or Type I error). From this validation procedure, we examined the minimum threshold for model  
115 probability that will give a robustness of 0.95 (Roux et al. 2016), that is, a 95% probability to correctly  
116 support a model given that its posterior probability is higher than the threshold. We applied this minimum  
117 probability to evaluate if the estimated posterior probability for the empirical data is robust.

118

#### 119 *Accounting for among-locus variation in genetic drift and migration*

120

121 For initial ABC comparisons, simulated demographic models assumed genome-wide homogenous  $N_e$   
122 and  $m$ . Accounting for differential rates of introgression and genomic variance in genetic drift that may  
123 result as an outcome of linked selection, however, has been shown to significantly improve the accuracy  
124 of demographic inferences in marine taxa (*Ciona* sp., Roux et al. 2013; *Mytilus* species, Roux et al.  
125 2014; sea bass, Tine et al. 2014; *Salmo salar*, Rougemont and Bernatchez 2018). To account for the  
126 combined effects of differential migration and variable among-locus rates of genetic drift, we re-  
127 simulated a series of nested models incorporating heterogeneous  $N_e$  and/or heterogeneous  $m$  under  
128 the best demographic scenario (inferred from initial homogeneous model comparisons) to estimate  
129 demographic parameters. Specifically, we were interested in whether these models provided an  
130 improved model probability (and parameter estimates) when compared to the best inferred model with  
131 homogeneous  $N_e$  and  $m$ .

132

133 In simulating these additional models, an initial value of  $N_e$  and  $m$  were randomly drawn as described  
134 above. These initial values of  $N_e$  and  $m$  were homogeneously applied for all the loci (homo). To account  
135 for differential selection and migration across the genome, we varied the initial  $N_e$  and  $m$  values for a  
136 certain proportion of loci. This proportion was drawn from a uniform distribution [0-1]. The  $N_e$  and  $m$  of

137 these sets of loci were modified by (i) decreasing the initial parameter value (hetero1) or (ii) allowing the  
138 each of these loci to have a lower or higher parameter than the initial draw (hetero2). For each locus  
139 with modified  $N_e$  and  $m$ , the amount of decrease/increase was proportional to the initial values by a  
140 certain factor, which was sampled from a beta distribution with shape parameters drawn from the interval  
141 [1-50] for  $N_e$  and [1-20] for  $m$ . We simulated  $1 \times 10^6$  simulations for a total of 13 additional heterogeneous  
142 models and calculated summary statistics as described above.

143

#### 144 *Demographic parameter inference*

145

146 Demographic parameters were estimated for each population pair using the posterior distribution  
147 approximated by accepted simulations under the best demographic model. Parameter values were log  
148 transformed prior to regression to ensure that the posterior distribution was contained within the prior  
149 bounds (e.g., Estoup et al. 2004; Hamilton et al. 2005). We used 50 neural networks and a maximum of  
150 2000 iterations to obtain weighted non-linear regressions of the parameters to the summary statistics  
151 from 1000 accepted simulations closest to the observed values (acceptance tolerance=0.001%).  
152 Parameter inference was based on estimated posterior means and 95% credible intervals when  
153 parameters were differentiated from the uniform prior.

154

155

156 **Literature Cited**

- 157 Beaumont, M. A. (2010). Approximate Bayesian computation in evolution and ecology. *Annual Review*  
158 *of Ecology, Evolution, and Systematics*, 41, 379–406.
- 159 Blum, M. G., & François, O. (2010). Non-linear regression models for Approximate Bayesian  
160 Computation. *Statistics and Computing*, 20(1), 63–73.
- 161 Bolger, A. M., Lohse, M., & Usadel, B. (2014). Trimmomatic: a flexible trimmer for Illumina sequence  
162 data. *Bioinformatics*, 30(15), 2114–2120.
- 163 Csilléry, K., François, O., & Blum, M. G. (2012). abc: an R package for approximate Bayesian  
164 computation (ABC). *Methods in Ecology and Evolution*, 3(3), 475–479.
- 165 Estoup, A., Beaumont, M., Sennedot, F., Moritz, C., & Cornuet, J. M. (2004). Genetic analysis of  
166 complex demographic scenarios: spatially expanding populations of the cane toad, *Bufo marinus*.  
167 *Evolution*, 58(9), 2021–2036.
- 168 Fu, L., Niu, B., Zhu, Z., Wu, S., & Li, W. (2012). CD-HIT: accelerated for clustering the next-generation  
169 sequencing data. *Bioinformatics*, 28(23), 3150–3152.
- 170 Fraïsse, C., Roux, C., Welch, J. J., & Bierne, N. (2014). Gene flow in a mosaic hybrid zone: is local  
171 introgression adaptive? *Genetics*, 197, 939–951.
- 172 Gérard, K., Bierne, N., Borsa, P., Chenuil, A., & Féral, J.-P. (2008). Pleistocene separation of  
173 mitochondrial lineages of *Mytilus spp.* mussels from Northern and Southern Hemispheres and  
174 strong genetic differentiation among southern populations. *Molecular Phylogenetics and Evolution*,  
175 49(1), 84–91.
- 176 Grabherr, M. G., Haas, B. J., Yassour, M., Levin, J. Z., Thompson, D. A., Amit, I., Adiconis, X., Fan, L.,  
177 Raychowdhury, R., & Zeng, Q. (2011). Full-length transcriptome assembly from RNA-Seq data  
178 without a reference genome. *Nature Biotechnology*, 29(7), 644.
- 179 Haas, B. J., Papanicolaou, A., Yassour, M., Grabherr, M., Blood, P. D., Bowden, J., Couger, M. B.,  
180 Eccles, D., Li, B., & Lieber, M. (2013). De novo transcript sequence reconstruction from RNA-seq  
181 using the Trinity platform for reference generation and analysis. *Nature Protocols*, 8(8), 1494.
- 182 Hamilton, G., Stoneking, M., & Excoffier, L. (2005). Molecular analysis reveals tighter social regulation  
183 of immigration in patrilocal populations than in matrilineal populations. *Proceedings of the National*  
184 *Academy of Sciences*, 102(21), 7476–7480.
- 185 Hilbish, T. J., Mullinax, A., Dolven, S. I., Meyer, A., Koehn, R. K., & Rawson, P. D. (2000). Origin of the  
186 antitropical distribution pattern in marine mussels (*Mytilus spp.*): routes and timing of  
187 transequatorial migration. *Marine Biology*, 136(1), 69–77.

188 Huang, X., & Madan, A. (1999). CAP3: A DNA sequence assembly program. *Genome Research*, 9(9),  
189 868–877.

190 Li, W., & Godzik, A. (2006). Cd-hit: a fast program for clustering and comparing large sets of protein or  
191 nucleotide sequences. *Bioinformatics*, 22(13), 1658–1659.

192 Lindberg, D. R. (1991). Marine biotic interchange between the northern and southern hemispheres.  
193 *Paleobiology*, 17(3), 308–324.

194 Magoč, T., & Salzberg, S. L. (2011). FLASH: fast length adjustment of short reads to improve genome  
195 assemblies. *Bioinformatics*, 27(21), 2957–2963.

196 Ripley, B., Venables, W., & Ripley, M. B. (2016). Package “nnet.” R Package Version, 7–3.

197 Roux, C., Tsagkogeorga, G., Bierne, N., & Galtier, N. (2013). Crossing the species barrier: genomic  
198 hotspots of introgression between two highly divergent *Ciona intestinalis* species. *Molecular*  
199 *Biology and Evolution*, 30(7), 1574–1587.

200 Roux, C., Fraïsse, C., Castric, V., Vekemans, X., Pogson, G. H., & Bierne, N. (2014). Can we continue  
201 to neglect genomic variation in introgression rates when inferring the history of speciation? A case  
202 study in a *Mytilus* hybrid zone. *Journal of Evolutionary Biology*, 27(8), 1662–1675.

203 Roux, C., Fraïsse, C., Romiguier, J., Anciaux, Y., Galtier, N., & Bierne, N. (2016). Shedding light on the  
204 grey zone of speciation along a continuum of genomic divergence. *PLoS Biology*, 14(12),  
205 e2000234.

206 Ross-Ibarra, J., Wright, S. I., Foxe, J. P., Kawabe, A., DeRose-Wilson, L., Gos, G., et al. (2008). Patterns  
207 of polymorphism and demographic history in natural populations of *Arabidopsis lyrata*. *PLoS ONE*,  
208 3(6), e2411.

209 Rougemont, Q., & Bernatchez, L. (2018). The demographic history of Atlantic Salmon (*Salmo salar*)  
210 across its distribution range reconstructed from Approximate Bayesian Computations. *Evolution*,  
211 72(6), 1261-1277

212 Tine, M., Kuhl, H., Gagnaire, P.-A., Louro, B., Desmarais, E., Martins, R. S., et al. (2014). European sea  
213 bass genome and its variation provide insights into adaptation to euryhalinity and speciation. *Nature*  
214 *Communications*, 5, 5770.

215

**Table S1.** Summary of prior distribution lower and upper bounds for 13 parameters (for each demographic model) shown in generation units (generation time=2 years). Effective populations sizes of derived ( $N_i$ ,  $N_j$ ) and ancestral ( $N_{ancestral}$ ) populations; migration rate ( $m$ ), where  $m_{ij}$  is the proportion of migrants from population  $j$  into population  $i$ ; ancient migration rate ( $ma$ ); time of secondary contact ( $T_{sc}$ ); time of the onset of ancient gene flow ( $T_{nc}$ ; backwards in time); divergence time ( $T_{div}$ ).

| Parameter                   | Demographic Model Priors: Lower bound – Upper bound |                |                |                |                |                 |
|-----------------------------|-----------------------------------------------------|----------------|----------------|----------------|----------------|-----------------|
|                             | <i>pan</i>                                          | <i>div</i>     | <i>im</i>      | <i>divSC</i>   | <i>divAGF</i>  | <i>divAGFSC</i> |
| $N_i$ $N_j$ $N_{ancestral}$ | 1000-500000                                         | 1000-500000    | 1000-500000    | 1000-500000    | 1000-500000    | 1000-500000     |
| $m_{ij}$                    | -                                                   | -              | 0-0.0001       | 0-0.5          | -              | 0-0.5           |
| $m_{ji}$                    | -                                                   | -              | 0-0.0001       | 0              | -              | 0               |
| $m_{aj}$                    | -                                                   | -              | -              | -              | 0-0.0001       | 0-0.0001        |
| $m_{aj}$                    | -                                                   | -              | -              | -              | 0-0.0001       | 0-0.0001        |
| $T_{sc}$                    | -                                                   | -              | -              | 5-300          | -              | 5-300           |
| $T_{nc}$                    | -                                                   | -              | -              | -              | 10000-1750000  | 10000-1750000   |
| $T_{div}$                   | -                                                   | 100000-1750000 | 100000-1750000 | 100000-1750000 | 100000-1750000 | 100000-1750000  |
| $ri$                        | -                                                   | -              | -              | 0.01-0.99      | -              | 0.01-0.99       |
| $\mu$                       | 0.00000002763                                       | 0.00000002763  | 0.00000002763  | 0.00000002763  | 0.00000002763  | 0.00000002763   |
| $\rho$                      | 0.5                                                 | 0.5            | 0.5            | 0.5            | 0.5            | 0.5             |



**Table S2.** Summary of stepwise comparison Akaike Information Criterion (AIC) between sequential migration models in TreeMix. We did not consider additional migration events when the difference between nested models was less than two ( $\Delta AIC < 2$ ).

| Number of migration events | Ln(likelihood) | AIC value | $\Delta AIC$ |
|----------------------------|----------------|-----------|--------------|
| 0                          | -1552.53       | 3109.06   | -            |
| 1                          | -361.959       | 727.918   | 2381.142     |
| 2                          | 174.862        | -345.724  | 1073.642     |
| 3                          | 215.341        | -426.682  | 80.958       |
| 4                          | 218.552        | -433.104  | 6.422        |
| 5                          | 219.126        | -434.252  | 1.148        |
| 6                          | 219.483        | -434.966  | 0.714        |
| 7                          | 219.483        | -434.966  | 0            |
| 8                          | 219.483        | -434.966  | 0            |
| 9                          | 219.483        | -434.966  | 0            |
| 10                         | 219.483        | -434.966  | 0            |

**Table S3.** Summary of model validation using pseudo-observed datasets. Values are shown for the A) Mediterranean-Tasmania and B) Atlantic-Tasmania populations pairs. Values for the best inferred model is indicated in **bold**.

A)

| <b>Model</b>         | <b>Precision</b> | <b>Misclassification rate (Type I error)</b> | <b>Mean Type II error</b> |
|----------------------|------------------|----------------------------------------------|---------------------------|
| <i>pan</i>           | 1.000            | 0.000                                        | 0.145                     |
| <i>div</i>           | 0.618            | 0.382                                        | 0.0776                    |
| <i>ima</i>           | 0.933            | 0.067                                        | 0.0088                    |
| <i>divSC</i>         | 0.390            | 0.610                                        | 0.0678                    |
| <b><i>divAGF</i></b> | <b>0.607</b>     | <b>0.393</b>                                 | <b>0.0826</b>             |
| <i>divSCAGF</i>      | 0.364            | 0.636                                        | 0.0354                    |

B)

| <b>Model</b>         | <b>Precision</b> | <b>Misclassification rate (Type I error)</b> | <b>Mean Type II error</b> |
|----------------------|------------------|----------------------------------------------|---------------------------|
| <i>pan</i>           | 1.000            | 0.000                                        | 0.1408                    |
| <i>div</i>           | 0.708            | 0.292                                        | 0.812                     |
| <i>ima</i>           | 0.948            | 0.052                                        | 0.0076                    |
| <i>divSC</i>         | 0.422            | 0.578                                        | 0.0618                    |
| <b><i>divAGF</i></b> | <b>0.587</b>     | <b>0.413</b>                                 | <b>0.0614</b>             |
| <i>divSCAGF</i>      | 0.397            | 0.603                                        | 0.0348                    |

**Table S4.** Summary of demographic model selection under an approximate Bayesian computation framework. Model posterior probabilities comparing all homogeneous and heterogeneous models (accounting for variation in  $N_e$  |  $m$  parameters) under each demographic scenario independently. **Bold** indicates the highest probability model for each comparison at an acceptance threshold of 0.001. Divergence time parameters were estimated under the best inferred demographic scenario (*divAGF*).

| Population             |          | Demographic Model Probability: Proportion of accepted simulations |           |              |              |                 |               |                 |
|------------------------|----------|-------------------------------------------------------------------|-----------|--------------|--------------|-----------------|---------------|-----------------|
|                        | Model    | Method                                                            | homo homo | homo hetero1 | hetero1 homo | hetero1 hetero1 | hetero2 homo  | hetero2 hetero1 |
| Mediterranean-Tasmania | div      | Neural Net                                                        | 0.0037    | -            | 0.0761       | -               | <b>0.4728</b> | -               |
|                        | ima      | Neural Net                                                        | 0.0023    | 0.0471       | 0.0014       | 0.0825          | 0.0030        | <b>0.8637</b>   |
|                        | divSC    | Neural Net                                                        | 0.0191    | 0.1048       | 0.0196       | 0.1491          | 0.0199        | <b>0.6875</b>   |
|                        | divAGF   | Neural Net                                                        | 0.0013    | 0.0020       | 0.0259       | 0.0421          | <b>0.6410</b> | 0.2877          |
|                        | divAGFSC | Neural Net                                                        | 0.0217    | 0.0984       | 0.0201       | 0.2688          | 0.0246        | <b>0.5664</b>   |
| Atlantic-Tasmania      |          |                                                                   |           |              |              |                 |               |                 |
|                        | div      | Neural Net                                                        | 0.0001    | -            | 0.0500       | -               | <b>0.9498</b> | -               |
|                        | ima      | Neural Net                                                        | 0.0009    | 0.0167       | 0.0016       | 0.0395          | 0.0042        | <b>0.9369</b>   |
|                        | divSC    | Neural Net                                                        | 0.0177    | 0.1129       | 0.0130       | 0.0674          | 0.0405        | <b>0.7486</b>   |
|                        | divAGF   | Neural Net                                                        | 0.0040    | 0.0398       | 0.0118       | 0.0265          | 0.4291        | <b>0.4888</b>   |
|                        | divAGFSC | Neural Net                                                        | 0.0222    | 0.0974       | 0.0192       | 0.1168          | 0.0465        | <b>0.6979</b>   |

**Figure S1.** Summary of genomic data filtering schemes applied to respective analyses.

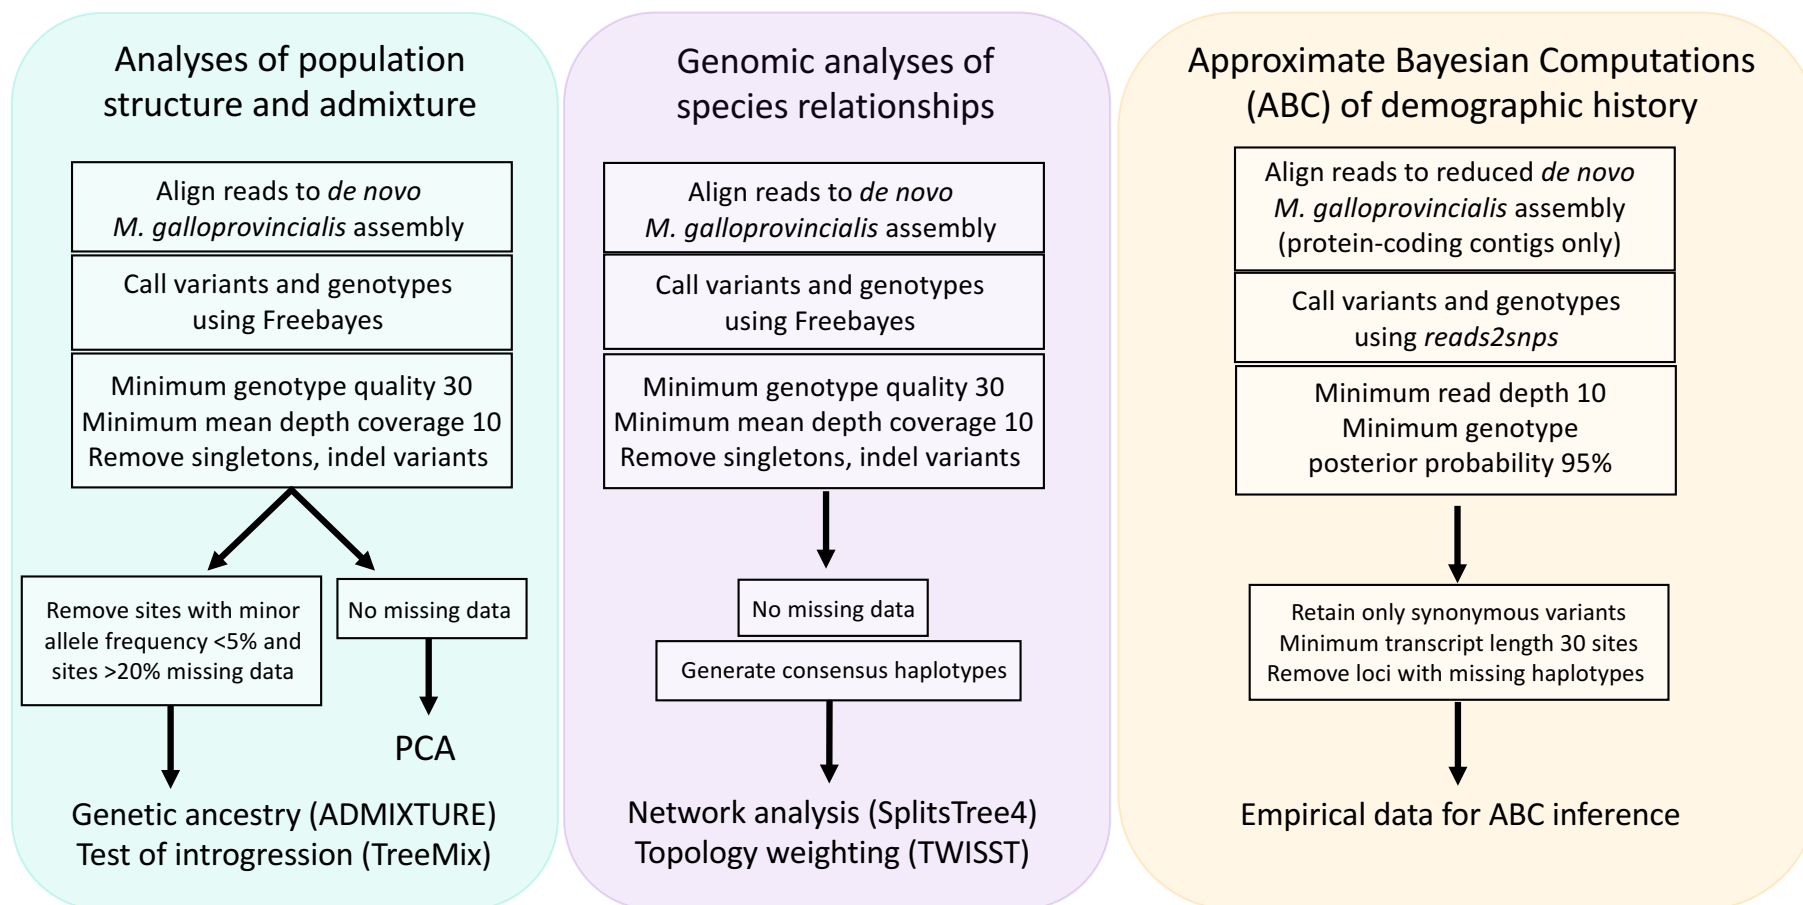

**Figure S2.** ADMIXTURE analyses for K=3 genetic clusters performed using 1 SNP per contig to account for linkage effects. Each bar represents an individual belonging to one or more ancestral clusters, corresponding to different colours.

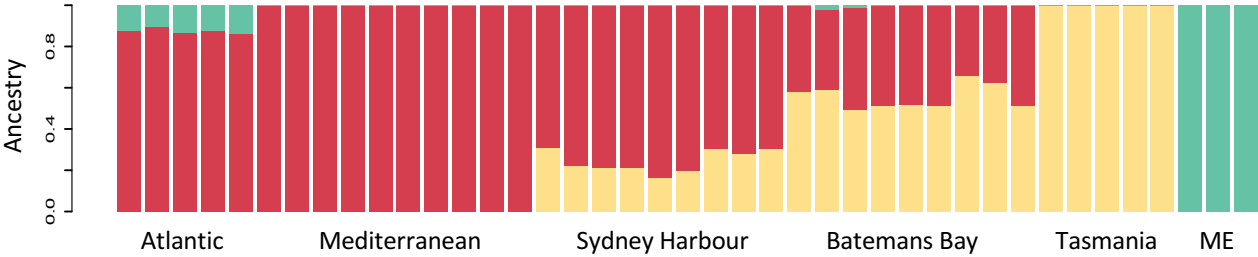

**Figure S3.** Maximum likelihood population tree without migration generated in TreeMix. The drift parameter indicates the amount of genetic drift that separates groups. Under a model of zero migration, the heat colours indicate pairwise population residual allele frequency covariance. The darkest boxes in this residual matrix indicate high genotypic covariance between Sydney Harbour or Batemans Bay populations with northern taxa.

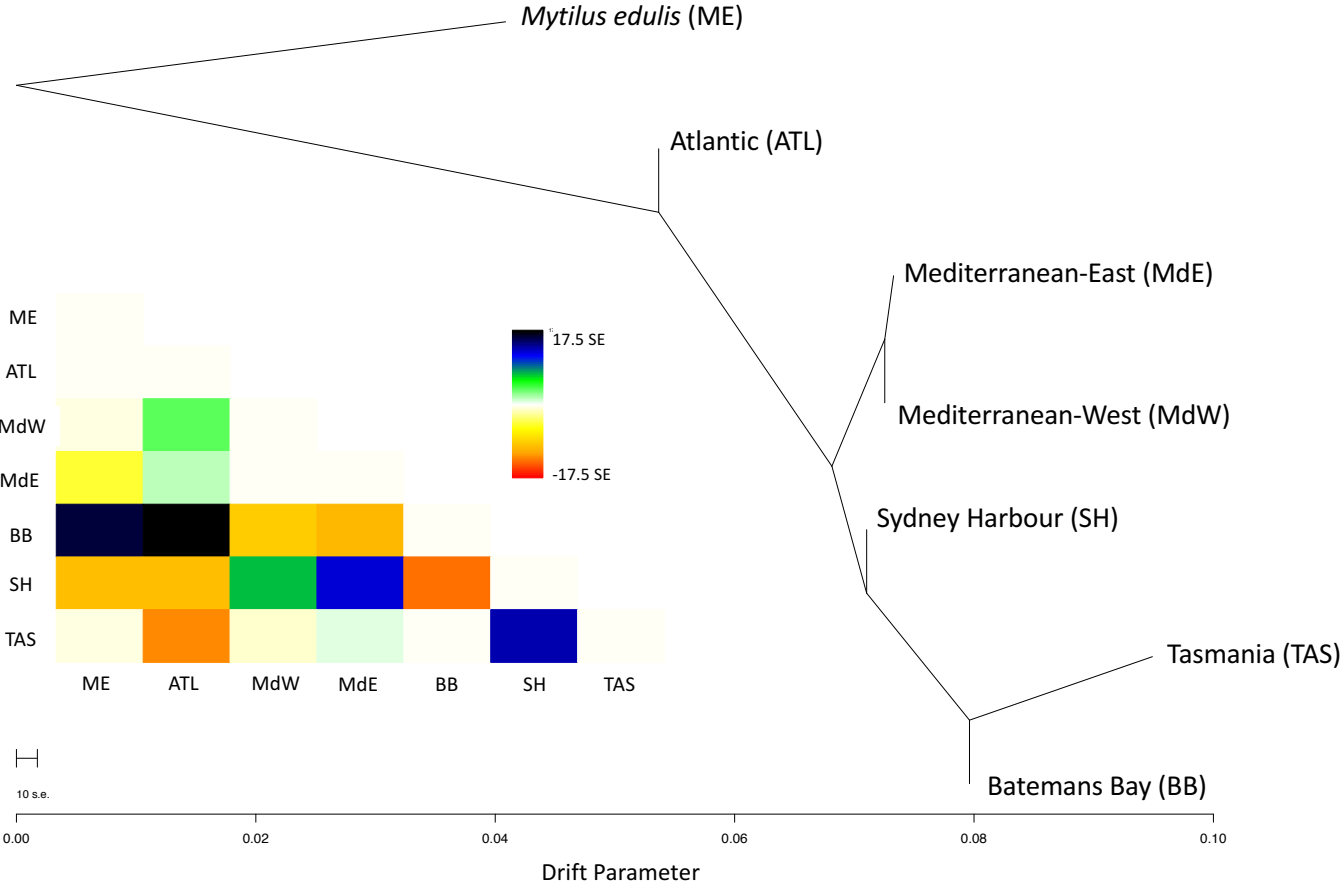

**Figure S4.** Summary of TWISST analyses of species relationships. Contributions of three possible unrooted topologies (hypotheses) to the nuclear species tree grouping *M. planulatus* (MP, Tasmania) with either *M. trossulus* (MT), *M. edulis* (ME) or *M. galloprovincialis* (MG, Mediterranean). Plots indicate i) mean topology contributions of 343 genealogies with a minimum tree length of 0.025; and ii) Distributions of the proportion of topology contributions across loci for three tested topologies.

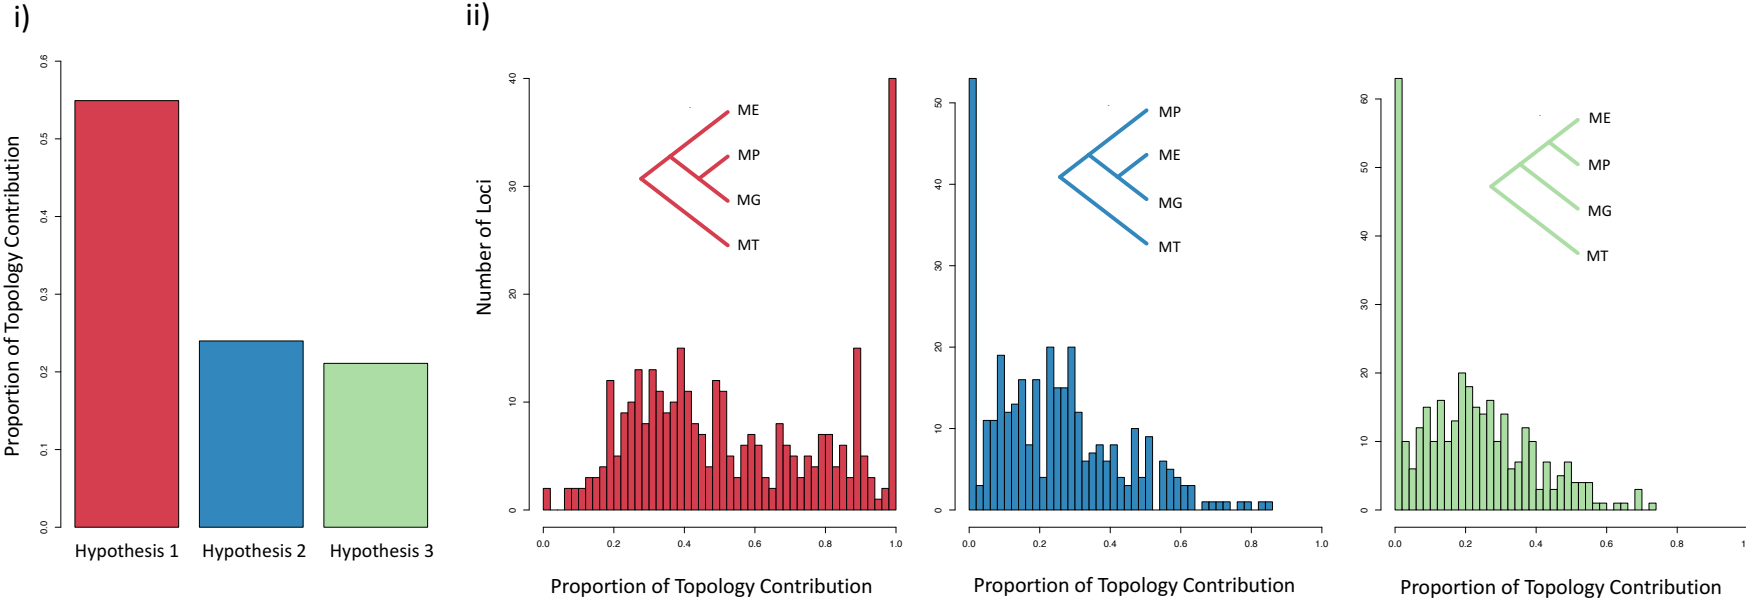

**Figure S5.** Summary of model choice validation using pseudo-observed datasets (PODS). Plots indicate the distributions of posterior probabilities for each true model. Model comparisons were carried out using 1000 PODS generated under the same model (shown in pink box plot).

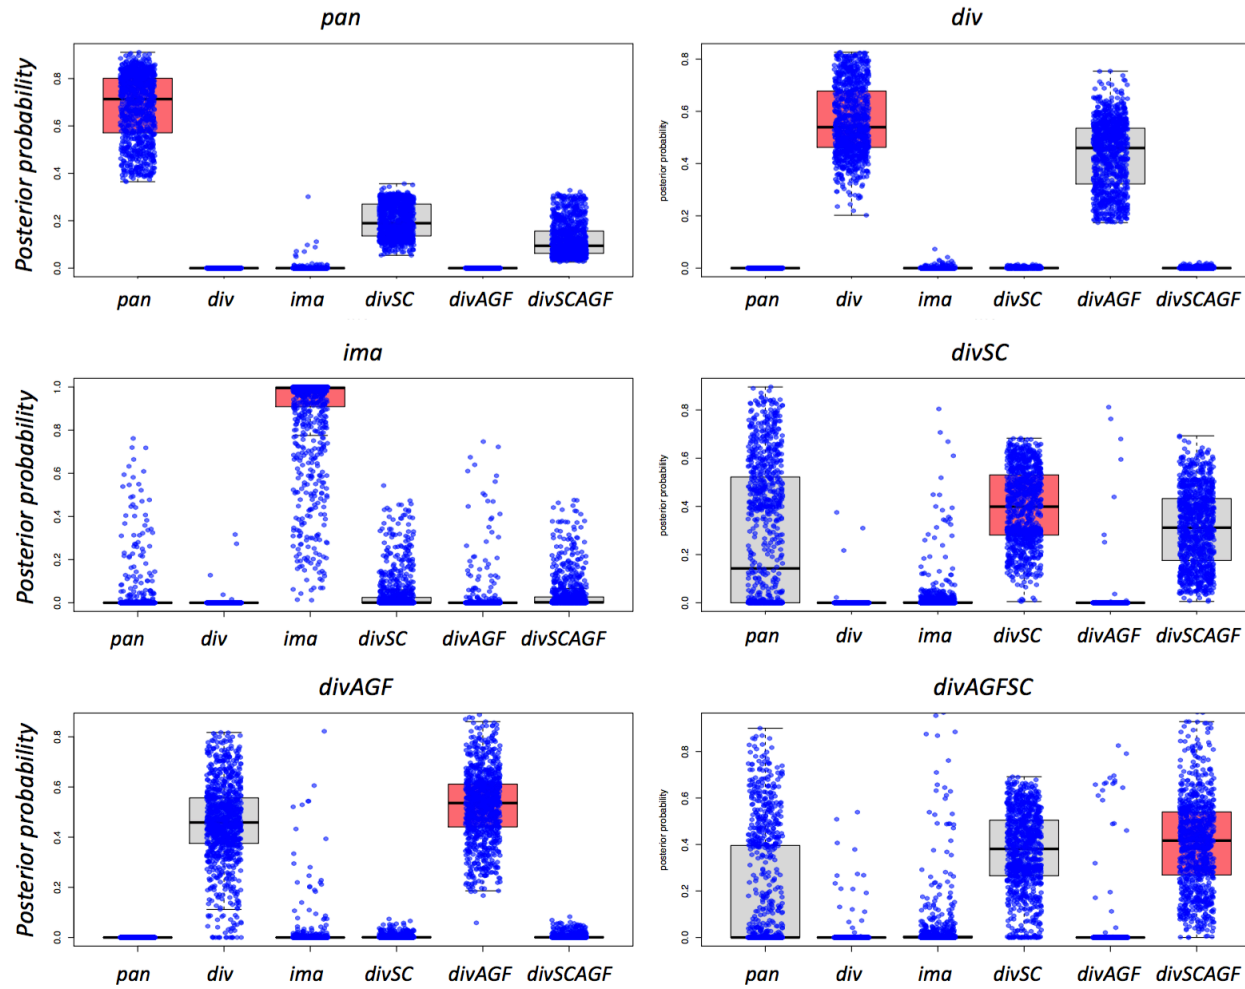

Supplement: EVA-13-515-s001.pdf [file EVA-13-515-s001.pdf]
